# 1 Mechanical demands of the two-handed hardstyle 2 kettlebell swing performed by an RKC-certified 3 Instructor

4  
5 Neil J. Meigh<sup>1</sup>, Wayne A. Hing<sup>1</sup>, Ben J. Schram<sup>1</sup>, Justin W.L. Keogh<sup>1,2,3</sup>

6  
7 <sup>1</sup> Faculty of Health Sciences and Medicine, Bond University, Gold Coast, Queensland, Australia

8 <sup>2</sup> Sports Performance Research Centre New Zealand, AUT University, Auckland, New Zealand

9 <sup>3</sup> Kasturba Medical College, Manipal Academy of Higher Education, Mangalore, Manipal,  
10 Karnataka, India

11  
12 Corresponding Author:

13 Neil Meigh<sup>1</sup>

14 Bond Institute of Health & Sport, 2 Promethean Way, Robina, QLD, 4226, Australia

15 Email address: [nmeigh@bond.edu.au](mailto:nmeigh@bond.edu.au)

## 16 17 Abstract

18 **Background.** The effects of hardstyle kettlebell training are frequently discussed in the strength  
19 and conditioning field, yet reference data from a proficient swing is scarce. The aim of this study  
20 was to profile the mechanical demands of a two-handed hardstyle swing performed by a Russian  
21 Kettlebell Challenge (RKC) Instructor.

22 **Methods.** The subject is a 44-year-old male, body mass 75.6 kg, height 173.5 cm, with 6 years of  
23 regular hardstyle kettlebell training since attaining certification in 2013. Two-handed hardstyle  
24 swings were performed with a series of incremental weight (8-68 kg) kettlebells. Ground reaction  
25 forces (GRFs) were obtained from a floor-mounted force platform. Force-time curves (FTCs),  
26 peak force, forward force relative to vertical force, rate of force development (RFD) and swing  
27 cadence were investigated.

28 **Results.** Data revealed the FTC of a proficient swing were highly consistent (mean SD = 47 N)  
29 and dominated by a single force peak, with a profile that remained largely unchanged with 8-24  
30 kg kettlebells. Pearson correlation analyses revealed a very strong positive correlation in peak  
31 force with kettlebell weight ( $r = 0.95$ ), which increased disproportionately from the lightest to  
32 heaviest kettlebells; peak net force increasing from  $8.36 \pm 0.75 \text{ N.kg}^{-1}$  ( $0.85 \times \text{BW}$ ) to  $12.82 \pm 0.39$   
33  $\text{N.kg}^{-1}$  ( $1.3 \times \text{BW}$ ). There was a strong negative correlation between RFD and kettlebell weight ( $r$   
34  $= 0.82$ ) decreasing from  $39.2 \text{ N.s}^{-1}.\text{kg}^{-1}$  to  $21.5 \text{ N.s}^{-1}.\text{kg}^{-1}$ . There was a very strong positive  
35 correlation in forward ground reaction force with kettlebell weight ( $r = 0.99$ ), expressed as a ratio  
36 of vertical ground reaction, increasing from 0.092 (9.2%) to 0.205 (20.5%). Swing cadence  
37 exceeded 40 swings per minute (SPM) at all weights.

38 **Conclusion.** Our findings challenge some of the popular beliefs of the hardstyle kettlebell swing.  
39 Consistent with hardstyle practice and previous kinematic analysis of expert and novice, force-

40 time curves show a characteristic single large force peak, differentiating passive from active  
41 shoulder flexion. Ground reaction force did not increase proportionate to bell weight, with a  
42 magnitude of forward force smaller than described in practice. These results could be useful for  
43 coaches and trainers using kettlebells with the intent to improve athletic performance, and  
44 healthcare providers using the kettlebell swing for therapeutic purposes. Findings from this study  
45 were used to inform the BELL Trial, a pragmatic clinical trial of kettlebell training with older  
46 adults. [www.anzctr.org.au](http://www.anzctr.org.au) ACTRN12619001177145.

47

## 48 **Introduction**

49 Kettlebell training has received increasing interest since the first publications in 2009 (Schnettler  
50 et al., 2009; Tucker, 2009). Proponents of kettlebell training claim improvements in muscular  
51 strength, cardiovascular endurance, explosive power, weight management/fat loss, flexibility, and  
52 superior athleticism (Tsatsouline, 2006). Many of the claimed benefits are believed to be attainable  
53 from the hardstyle swing, popularised by Pavel Tsatsouline. A hardstyle swing has been proposed  
54 to have some kinematic similarities to both a barbell deadlift and countermovement vertical jump  
55 (Tsatsouline, 2006), but the kettlebells' shape and offset centre of mass make the kettlebell swing  
56 unique, allowing it to be swung between the legs.

57

58 National Strength and Conditioning Association (NSCA) standards and guidelines for strength and  
59 conditioning professionals state that knowledge of proper technique is a cardinal principle of  
60 coaching (NSCA, 2017). There is however, sparse quantitative data of a proficient swing to better  
61 understand what McGill and Marshall called "street wisdom" (2012), thus confidence is low that  
62 the current body of evidence is representative of a proficient swing. If hardstyle technique is  
63 essential for achieving the claimed effects, it must be clearly defined in execution and  
64 measurement.

65

66 A recent scoping review (Meigh et al., 2019) identified the two-handed hardstyle swing as the  
67 most wisely investigated kettlebell technique. More than half of the published studies cited  
68 Tsatsouline, however, over 80% of study participants were novices. Among 68 studies, it appeared  
69 that only four had been conducted by certified hardstyle Instructors (Back et al., 2016; Jay et al.,  
70 2011; Thomas et al., 2014; Wesley & Kivi, 2017) and only one (Back et al., 2016) provided data  
71 from hardstyle-certified practitioners. While certification is not necessary to achieve proficiency,  
72 certification could be linked to increased accuracy and reliability that a technique will be  
73 performed and assessed consistently. Much remains unknown about the proficient hardstyle swing,  
74 especially how this may change as a function of kettlebell load. Thus, a kinetic profile of the  
75 proficient swing is warranted.

76

77 There are distinct kinematic differences between a novice and expert performing a hardstyle swing  
78 with a 16kg kettlebell. A kinematic analysis by Back and colleagues (2016) showed that experts  
79 used 20° more hip flexion to perform a 'hip hinge', and 19° less shoulder range; the kettlebell being

80 swung upward rather than lifted. A sequence of movements at the hips, pelvis and shoulder during  
81 the upswing and downswing phases of a swing cycle was reported, with both sequences reversed  
82 between expert and novice. During the upswing, experts lead with the hips followed by the  
83 shoulders, whereas novices lead with the shoulders. During the downswing, experts allowed the  
84 bell to drop before flexing at the hips, while novices flexed at the hips first and the shoulders  
85 followed. At the top of the kettlebells' arc of motion, the experts stood upright in terminal hip and  
86 knee extension, but the novices did not. A significant difference in angular velocity at the hips of  
87 223.8°/s between expert (635.5°/s) and novice (411.7°/s), highlights the ballistic nature of a  
88 proficient hardstyle swing when performed by experts. As reaction force is a product of mass and  
89 acceleration, significant differences in associated ground reaction force (GRF) between expert and  
90 novice would be expected.

91  
92 Lake and Lauder (2012) were the first to quantify the mechanical demands of a two-handed  
93 hardstyle swing. With a 24 kg kettlebell, peak force was reported to be 19.6 (1.4) N.kg<sup>-1</sup>, impulse  
94 2.5 (0.3) N.kg<sup>-1</sup>.s, and peak power 28.6 (6.6) W.kg<sup>-1</sup>. Horizontal forward force was subsequently  
95 reported to be almost 30% of vertical force (Lake et al., 2014). Contrary to typical hardstyle  
96 practice, the start position was described as “standing still with the kettlebell held in both hands at  
97 arm’s length in the ‘finished deadlift’ position, with the kettlebell lightly touching the upper  
98 thighs”. The impact of analysing a swing cycle from standing upright, as opposed to the back or  
99 bottom position with the bell between and behind the legs, may be a potential reason that force  
100 appears to be *decreasing* throughout the propulsive phase.

101  
102 McGill and Marshall (2012) included an electromyographic analysis when they conducted a case  
103 study of Pavel Tsatsouline performing one and two-handed swings with 32kg. While the surface  
104 electromyographic data is interesting, the lack of any kinetic or kinematic data of Tsatsouline’s  
105 swing makes it somewhat difficult for practitioners to use such information to improve their  
106 coaching of the hardstyle kettlebell swing. With this exception, Back and colleagues (2016)  
107 remains the only observation of a hardstyle swing performed by a certified Instructor, and the only  
108 report of proficient swing kinematics. Prescribing an exercise in the absence of reference standards  
109 is challenging for coaches and healthcare providers. This is especially true with athletes for whom  
110 improvements in physical performance are crucial, and higher-risk populations with chronic health  
111 conditions. Typical resistance training guidelines for intensity, sets, and repetitions, are not used  
112 in hardstyle practice, thus reference standards will help to improve the accuracy and reliability of  
113 further research using hardstyle techniques and training protocols.

114  
115 The aim of this exploratory study was to profile the mechanical demands of the two-handed  
116 hardstyle swing in a certified Instructor across a range of kettlebell loads. A representative FTC,  
117 peak ground reaction force, rate of force development (RFD) and swing cadence are reported.  
118 Results were used to inform the BELL trial ([www.anzctr.org.au](http://www.anzctr.org.au) ACTRN12619001177145).

119

## 120 **Materials & Methods**

### 121 **Subject**

122 The subject is a 44-year-old male, body mass = 75.6 kg, height = 173.5 cm. He had been training  
123 consistently with kettlebells since gaining Instructor certification in 2013, including a period of 20  
124 months (2016/17) running community group kettlebell classes six days a week. The subject was  
125 free from injury with no health or medical conditions which would have influenced task  
126 performance. Consent was given for the data to be used for scholarly submission, with ethical  
127 approval for this study granted by Bond university Human Research Ethics committee  
128 (NM03279).

129

### 130 **Protocol**

131 Data were collected from the University biomechanics laboratory in a single session. The subject  
132 performed two-handed kettlebell swings to chest-height on a floor-mounted force platform (AMTI,  
133 Watertown, NY, USA) recording GRF at 1000 Hz using NetForce software (AMTI, USA). Subject  
134 body mass was captured by the force plate from a period of quiet standing. Tri-plantar force  
135 variables were obtained from the floor-mounted force platform. The variables of interest were peak  
136 GRF, dynamic RFD, and swing cadence. The subject performed a single set of 12 repetitions with  
137 each kettlebell, with the middle ten 10 repetitions used for analysis. A custom program (Microsoft  
138 Excel, Version 2012) was used to calculate peak force during each swing cycle of the set, with  
139 values manually assessed and verified against the corresponding FTC. To obtain peak net force,  
140 system weight (body mass + kettlebell weight) was subtracted from the square root of squared and  
141 summed data:

142 
$$\sqrt{F_z^2 + F_x^2 + F_y^2}$$
 ( $F_z$  = vertical force,  $F_y$  = horizontal forward force,  $F_x$  = medio-lateral force).

143 The back or bottom position of the swing was used as the start of each swing cycle. Dynamic RFD  
144 ( $\text{N}\cdot\text{s}^{-1}$ ) during hip extension (propulsion) was calculated as the change in GRF during Phase 1  
145 divided by elapsed time and normalised to body mass ( $\text{N}\cdot\text{s}^{-1}\cdot\text{kg}^{-1}$ ), and reported as the mean of 10  
146 swings. Cadence in swings per minute (SPM) was calculated from the average time between the  
147 peak force during hip extension in each swing cycle. Rate of perceived exertion (RPE) was  
148 captured for the lightest (8 kg) and heaviest (68 kg) weights. Peak force is reported as resultant  
149 force unless stated otherwise.

150

### 151 **Procedure**

152 Swings were performed as described by the RKC Instructor manual (Tsatsouline, 2013). Data from  
153 our laboratory indicated that different shod conditions (flat canvas shoes, trainers/sneakers, Oxford  
154 lace-up shoes, barefoot), were unlikely to significantly alter the outcome of the study  
155 (Supplementary file A). Swings were thus performed barefoot as recommended. The subject  
156 performed a brief self-prescribed mobility drill, with the lighter weights serving as a warm-up for  
157 the heavier sets. All sets started and stopped with the kettlebell in a dead-start position on the  
158 ground, the feet placed comfortably in the middle of the force platform at a distance roughly equal  
159 to the length of the foot behind the bell, as previously described (Thomas et al., 2014). Swings

160 were performed with kettlebells from 8 kg to 68 kg. Weight increased in increments of 2 kg from  
161 8 kg to 24 kg, then in increments of 4 kg from 24 kg to 48 kg, finishing with 56 kg and 68 kg  
162 kettlebells. Weights up to 32 kg were Force USA competition kettlebells of standardised  
163 dimensions. Kettlebells 36-68 kg were the ‘traditional’ shape, but due to accessibility issues they  
164 were purchased from Force USA (36-40 kg), Aussie Strength (44-48 kg) and Rogue (56-68 kg).  
165 The subject was sufficiently rested between sets so that fatigue would not influence any of the  
166 outcomes.

167

### 168 **The hardstyle swing**

169 Consistent with Wesley (2013) and Thomas and colleagues (2014), the two-handed hardstyle  
170 swing is illustrated in Figure 1. Positions in the swing cycle are described as the Start (Fig. 1, A),  
171 mid-swing (E) and End (I). The up- and downswing portions of a swing cycle each have two  
172 phases. The first phase of the upswing (propulsion) is described by its primary movement; hip  
173 extension. The second phase is the *float*. The first phase of the downswing is the *drop*. The final  
174 phase in the cycle is described as braking or deceleration, in which the kettlebell returns to its start  
175 position. A ballistic movement resulting in periods of float and drop distinguish the hardstyle  
176 swing from the double knee bend swing of kettlebell sport.

177

178 In the start position, the hips and knees are in terminal flexion (for the exercise), with the kettlebell  
179 positioned between the legs and behind the body, mid-forearms in contact with the upper thighs.  
180 The trunk is flexed at approximately 45°. Propulsion involves rapid extension of the hips and knees  
181 to initiate the bells’ forward and upward trajectory. *“The hips drive explosively from the back  
182 swing and then there is a momentary float as the kettlebell reaches the apex of the swing”*  
183 (Tsatsouline, 2013, p. 48). Propulsion ends when the hips and knees reach terminal extension.

184

185 During *float*, the shoulders move through passive flexion until the bell reaches its highest vertical  
186 displacement at mid-swing. Throughout *drop*, the hips and knees remain in terminal extension, as  
187 the shoulders passively extend, gravity acting on the kettlebell to accelerate it downward. ‘Drop’  
188 ends when the hips and knees begin to flex, the bell at roughly hip height, and upper arms in contact  
189 the ribs. The point at which the person accepts the weight of the kettlebell through the upper limbs,  
190 immediately prior to braking, can be described as the ‘catch’. Braking is intended to be borne by  
191 the lower limbs, predominantly through eccentric action of the hip extensors. *“at the back of the  
192 swing you use the elastic power generated to immediately explode the kettlebell up for another  
193 rep. There is no need to swing the kettlebell higher than your chest. The movement of the kettlebell  
194 is forward and back, not up and down”* (Tsatsouline, 2013, p. 48).

195

196 Hardstyle swing – RKC standards (Tsatsouline, 2013)

- 197 1. The back must remain neutral. \* At the bottom of the swing, the neck should be slightly  
198 extended or neutral.
- 199 2. The heels, toes and balls of the feet must be planted. The knees must track the toes.

- 200 3. The working shoulder must be packed [retracted].  
201 4. During the backswing, the kettlebell handle must pass above knee level.  
202 5. In the bottom position, the working arm must be straight, and elbow locked.  
203 6. There should be no forward movement of the knees or added flexion of the ankles during the  
204 upswing.  
205 7. The body should form a straight line at the top of the swing. The hips and knees should be  
206 fully extended, and the spine should remain neutral. \*  
207 8. Biomechanical breathing should be maintained – exhale when the hips and knees lock out.  
208 9. The abs and glutes should visibly contract at the top of the swing.  
209 10. The kettlebell should float for a moment at the apex of the swing while the hips remain  
210 locked out.  
211 11. The hips begin to move back after the upper arm has connected with the ribcage and not  
212 before.  
213

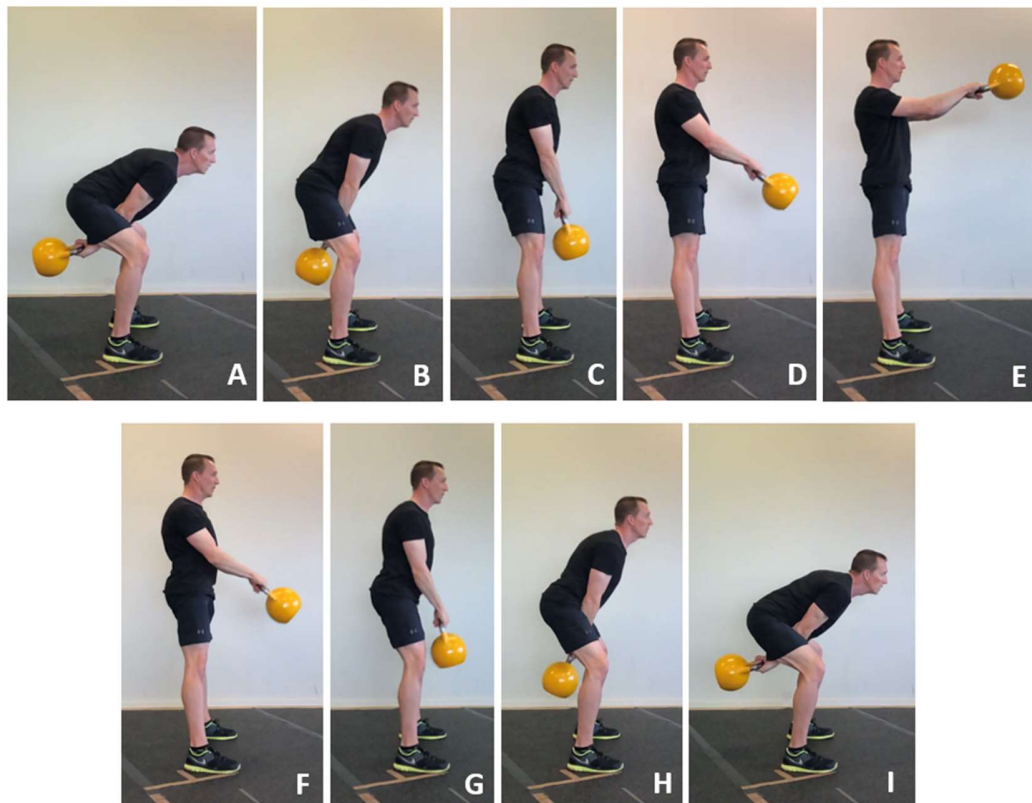

214  
215 **Figure 1.** A single two-handed hardstyle swing cycle. A) The Start position of a swing cycle. A-C) Phase 1 - upward  
216 *propulsion* of the kettlebell, D-E): Phase 2 - the *float* - passive shoulder flexion with hips and knees in terminal  
217 extension, E) *Mid-swing* (top of the swing). E-F): Phase 3 – the *drop* - passive extension of the shoulders with hips  
218 and knees in terminal extension, G-I): Phase 4 - *deceleration* (braking) of the kettlebell to the bottom of the swing, I)  
219 End of the cycle (bottom of the swing). \*: subject has Scheuermann’s kyphosis.

220  
221

## 222 **Statistical analyses**

223 Measures of centrality and dispersion are presented as mean  $\pm$  SD. Effect sizes (ES) were  
224 calculated and interpreted using Lenhard and Lenhard (2016) and Magnusson (2021). Effect sizes  
225 were quantified as trivial, small, moderate, large, very large, and extremely large where  $ES < 0.20$ ,  
226  $0.20-0.59$ ,  $0.60-1.19$ ,  $1.20-1.99$ ,  $2.0-3.99$  and  $\geq 4.0$  respectively (Hopkins et al., 2009). Probability  
227 of superiority has been used to illustrate the Cohen's  $d$  effect size, representing the chance that a  
228 person from group A will have a higher score than a person picked at random from group B. Linear  
229 regression was used to calculate the regression coefficients between the independent variable load,  
230 and dependent variables force, and cadence. Correlations were investigated using Pearson product-  
231 moment correlation coefficient, with preliminary analyses performed to ensure no violation of the  
232 assumptions of normality, linearity, or homoscedasticity. Data were analysed and linear regression  
233 calculated in SPSS (version 26.0; SPSS Inc., Chicago, IL, USA).

234

## 235 **Results**

236 Force-time curves from swings with 8 kg, 16 kg, 28 kg and 68 kg are presented in Fig. 2. Profiles  
237 from all kettlebell weights set are shown in Supplementary file B. The FTC of a proficient  
238 hardstyle swing is characterised by a tall, single narrow force peak, closely followed by a second  
239 distinct force peak of smaller magnitude. The characteristic profile remained consistent from 8-24  
240 kg. It was apparent from the FTC of a 28 kg swing (Fig. 2C), that the subject was unable to maintain  
241 the same duration of float and drop, evident by the progressive merging of the two force peaks. A  
242 visual change to the braking phase duration was already evident with a 20 kg kettlebell (Supp. file  
243 B). With cadence remaining relatively unchanged, the duration of the propulsive phase increased  
244 with kettlebell mass, with the duration of float and drop phases decreasing. The braking phase,  
245 shown as a relatively horizontal force approximating body mass during swings with a 16 kg  
246 kettlebell (Fig. 3A), was almost completely absent in the FTC of a swing with 68 kg (Fig. 3B).  
247 Within-set variability between swing cycles remained small regardless of weight and change in  
248 FTC.

249

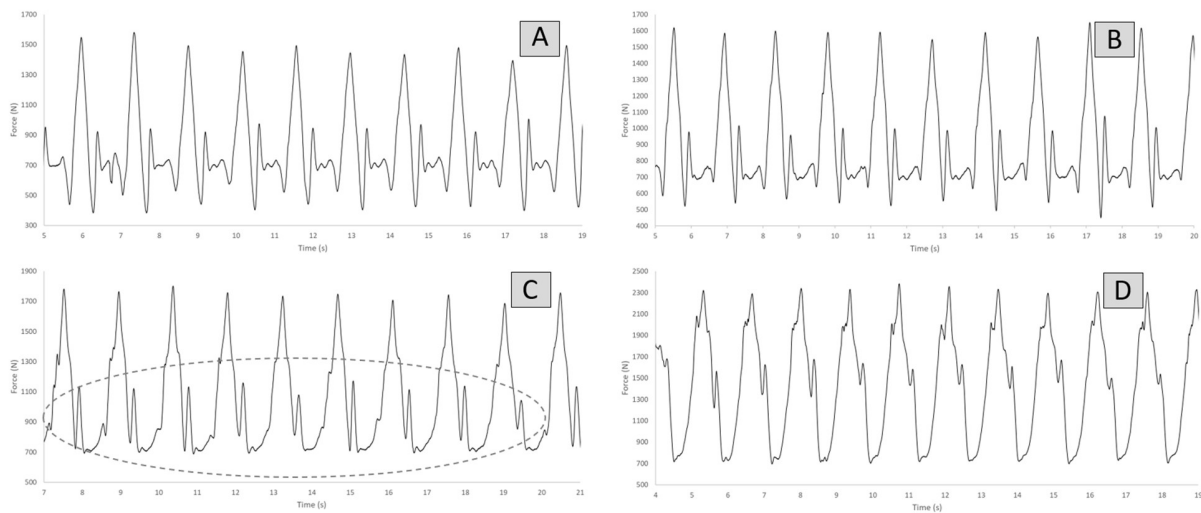

250

251 **Figure 2.** Force-time profiles with (A) 8 kg, (B) 16 kg, (C) 28 kg, (D) 68 kg.

252

253 A representative FTC of a single swing cycle with a 16 kg kettlebell is presented in Fig. 3A. Phase  
254 location and durations have been approximated. *Start* and *mid-swing* positions can be reached  
255 using a metronome at 80 beats per minute (cadence, 40 swings per minute (SPM)), suggesting that  
256 the upward and downward portions of the cycle using light to moderate kettlebell weights are  
257 approximately equal (47.5% and 52.5% respectively; Fig. 3A). Phase 2 & 3 (*float* and *drop*)  
258 accounted for approximately one-third of the swing cycle with a 16 kg kettlebell. Peak ground  
259 reaction force ( $1605.9 \pm 29.7$ ) was 2.17x BW during the propulsive phase of the upswing, and less  
260 than body mass (741 N) for most of the braking phase. A consistent FTC with light to moderate  
261 weights (8-24 kg) showed minimal change in technique. Weights above 24 kg however influenced  
262 swing performance, such that the duration of the float and drop phases progressively diminished.

263

264 Figure 3B shows the considerably altered FTC with the heaviest kettlebell (68 kg). The elapsed  
265 time difference in the presented swing cycles is 0.03s (Fig. 3A = 1.4s, Fig. 3B = 1.46s). Time to  
266 peak force (propulsion) with the 68 kg kettlebell however was 0.82s; >2.5x longer than propulsion  
267 with the 16 kg kettlebell. This increased the proportion of the propulsive phase in the swing cycle  
268 from 22.7% with 16 kg to 56.3% with 68 kg. A ‘double-peak’ appears to correspond with an  
269 accessory effort to move the kettlebell vertically. Movement strategies observed in novices,  
270 include active shoulder flexion to ‘lift’ the kettlebell, and excessive extension of the trunk (Back  
271 et al., 2016). The braking phase illustrated in the FTC with 16kg (Fig. 3A), where GRF remains  
272 relatively constant, is almost entirely absent with the 68 kg kettlebell (Fig. 3B). Horizontal forward  
273 force expressed relative to vertical force, increased from 0.11 (11%) with 16 kg to 0.21 (21%) with  
274 68 kg.



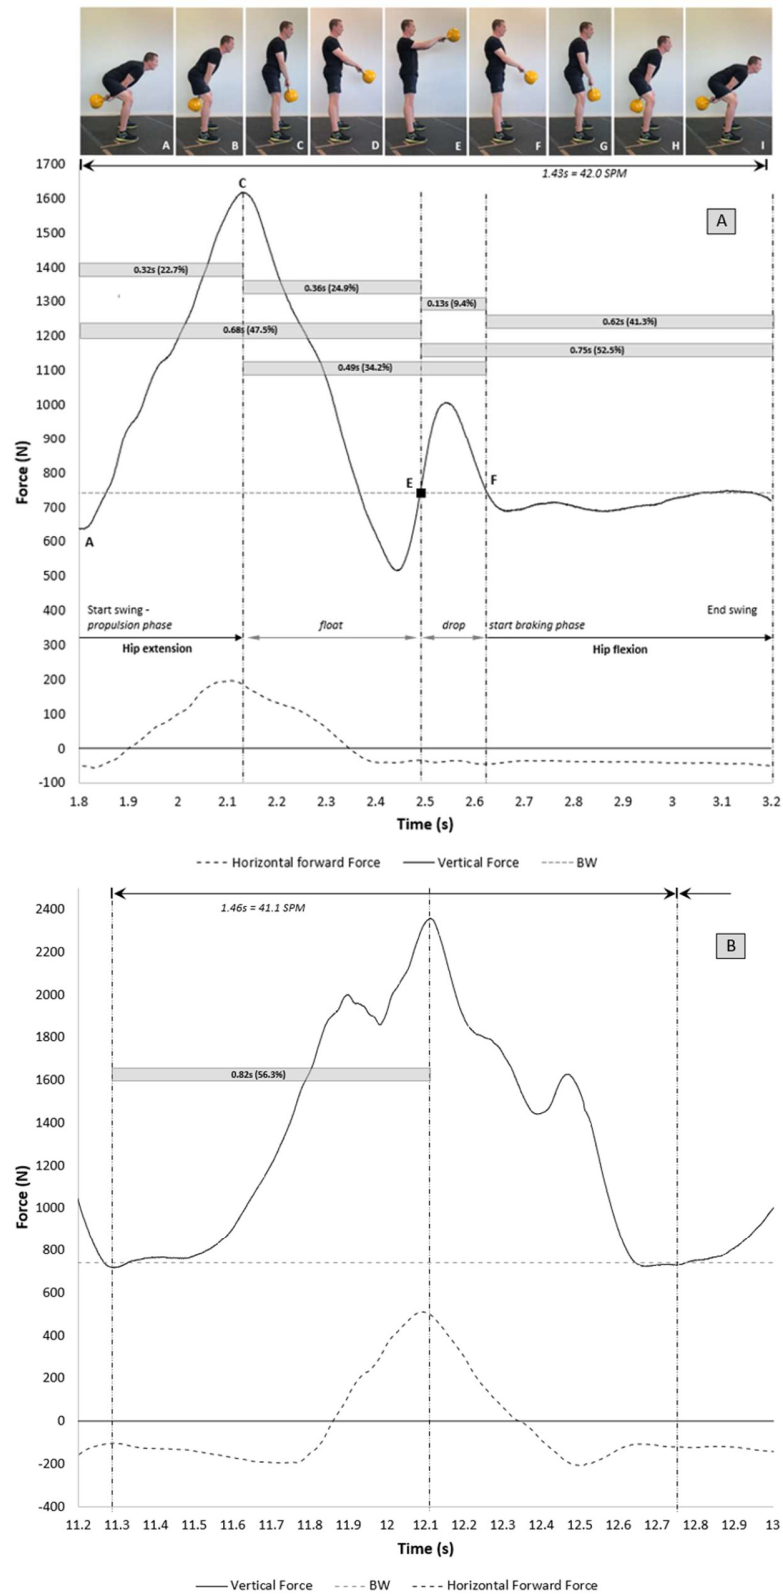

275

276

277

278

**Figure 3.** Representative force-time curves of a single two-handed hardstyle swing performed with a 16 kg (A) and 68 kg kettlebell (B). Time and duration of each phase within the 16 kg swing cycle (propulsion, float, drop, braking)

279 have been approximated from the corresponding sequence of images and kinematic sequence of movements. Force =  
280 system weight (body mass (741 N) + kettlebell mass (157 N (16kg), 667 N (68 kg)).  
281  
282 Figure 4A-E show peak force, RFD, forward force, and swing cadence for all kettlebell weights.  
283 There was a very strong positive correlation ( $r = 0.95$ ) in peak net force with kettlebell weight,  
284 increasing from  $631.8 \pm 56.4$  N with the 10 kg kettlebell, to  $968.4 \pm 29.1$  N with the 68 kg kettlebell  
285 (Fig. 4 A). Normalised to body mass, net force increased from  $8.36 \pm 0.75$  N.kg<sup>-1</sup> to  $12.82 \pm 0.39$   
286 N.kg<sup>-1</sup>; a 1.5x increase in net force, corresponding with a 8.5x increase in kettlebell weight.  
287 Expressed relative to body mass, peak net force increased from 0.85x BW to 1.3x BW. Subject  
288 reported RPE (Foster et al., 2001) increased from very, very easy (1/10) with 8kg, to very hard  
289 (7/10) with 68kg. There was small within-set variability (SD) in peak force, ranging from 29.1 N  
290 with the 68 kg kettlebell, to 76.7 N with the 14 kg (Fig. 4, B), with a mean SD of 47.0 N. Variability  
291 in RFD is larger with the 28 kg, 32 kg and 36 kg kettlebells due the change in FTC making the  
292 start of hip extension less distinct. There was a strong negative correlation ( $r = 0.82$ ) in RFD with  
293 kettlebell weight, decreasing from  $39.2$  N.s<sup>-1</sup>.kg with the 8 kg kettlebell, to  $21.5$  N.s<sup>-1</sup>.kg with the  
294 40 kg kettlebell (Fig. 4, C). There was a very strong positive correlation ( $r = 0.99$ ) in forward force  
295 with kettlebell weight, from 0.092 (9.2%) to 0.205 (20.5%) (Fig. 4, D). There was only a weak  
296 positive correlation ( $r = 0.41$ ) in swing cadence with kettlebell weight, increasing from 41.1 SPM  
297 with 20 kg to 44.0 SPM with 68 kg. Cadence for all swing sets was higher than the subject's self-  
298 reported usual training cadence (40 SPM).

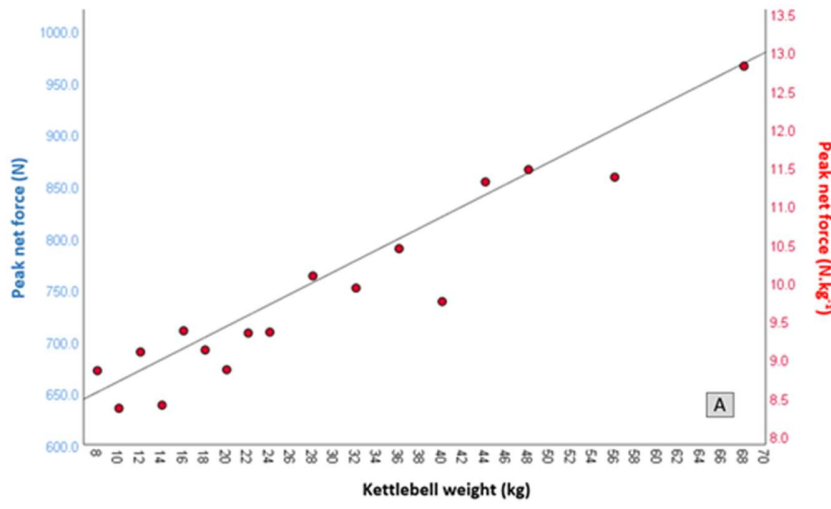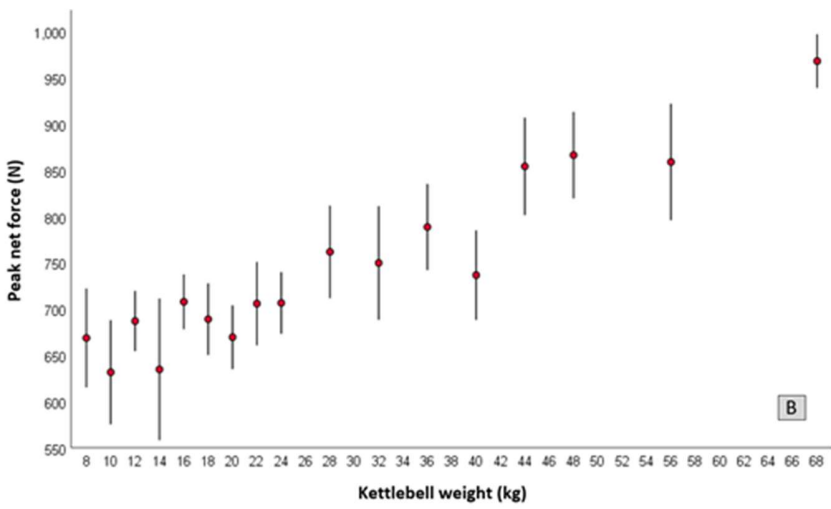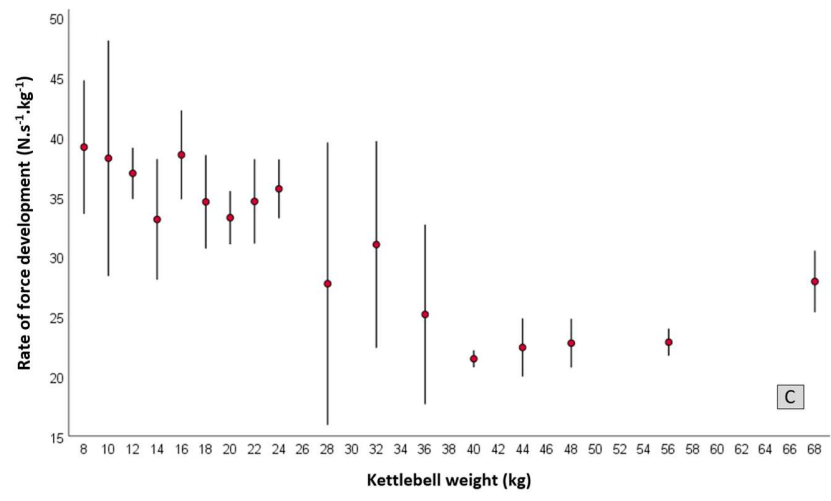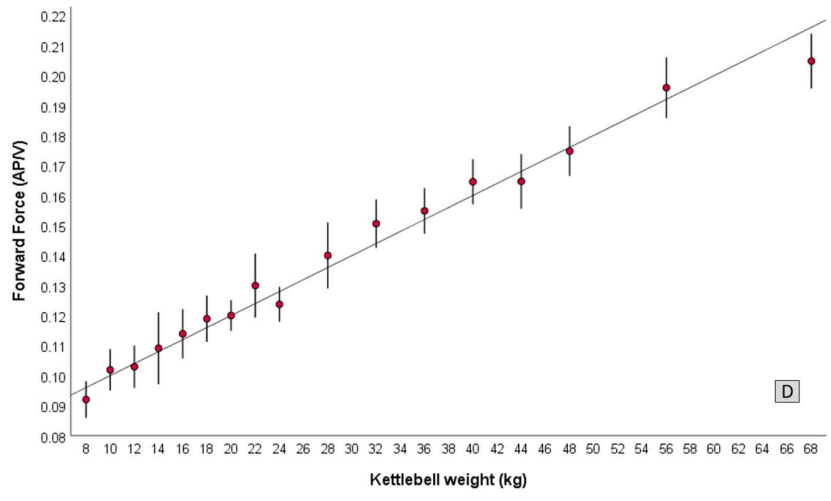

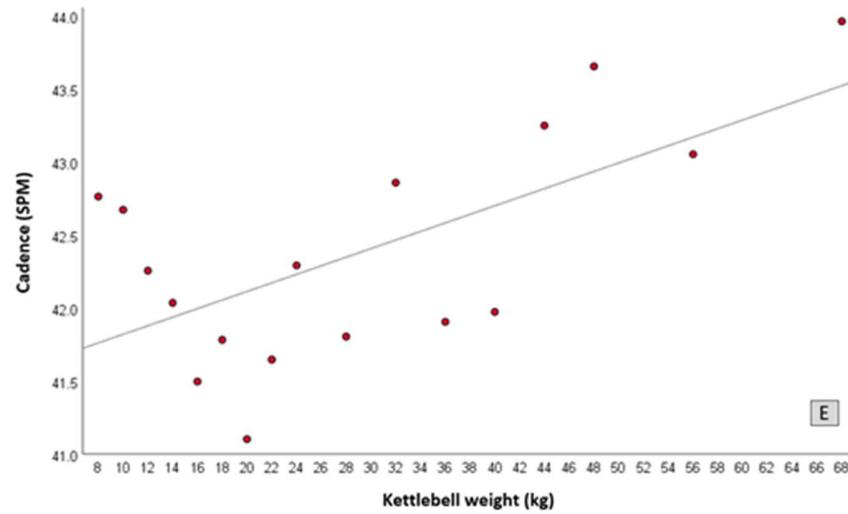

299 **Figure 4.** Change in force variables and swing cadence with increasing kettlebell weight. A: peak net force, B: variability in peak net force, C: rate of force  
 300 development, D: ratio of forward horizontal force to vertical force (A = anterior, V = vertical), E: swing cadence (SPM).

301  
 302 Force variables and cadence with increasing kettlebell weight for the most frequently used and  
 303 commonly commercially available weights (8 to 32 kg), are presented in Table 1 and Figure 5.  
 304 Linear regression equations are presented in Table 2.  
 305

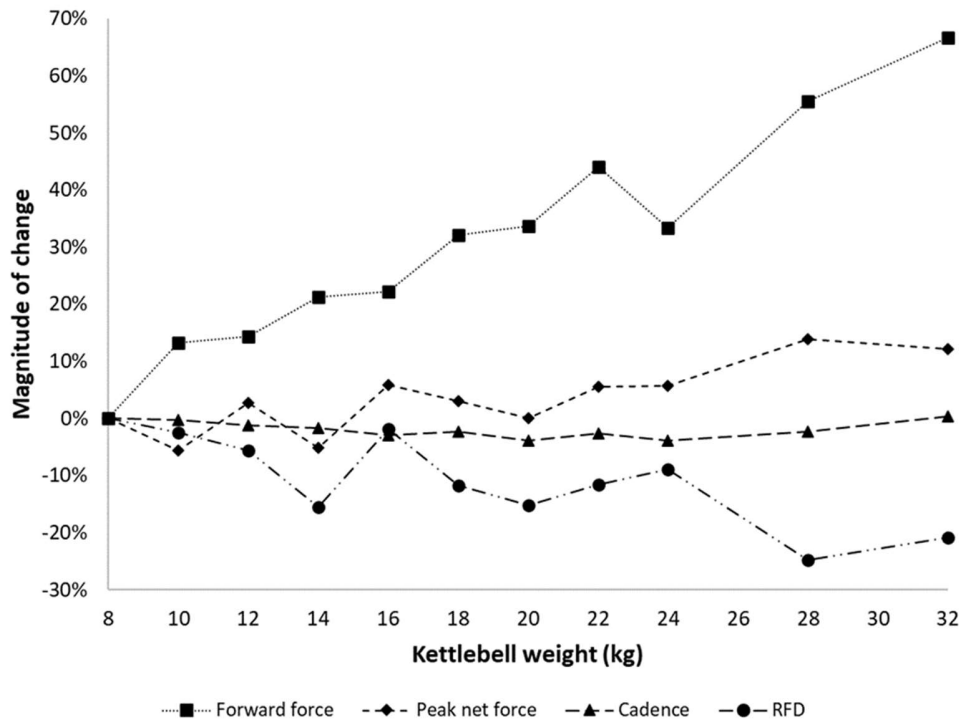

306  
 307 **Figure 5.** Magnitude of change with increasing kettlebell weight, from 8 kg to 32 kg.  
 308

309 **Table 1:** Force variables and cadence with increasing kettlebell weight for the most frequently used and commercially  
 310 available weights (8 to 32 kg).

| Kettlebell weight (kg) | Peak force    |                       |             | RFD (N.s <sup>-1</sup> .kg <sup>-1</sup> ) | Net peak force |                       |              | Net RFD (N.kg <sup>-1</sup> .s <sup>-1</sup> ) | Force (AP/V) (0.006) | Cadence (SPM) |
|------------------------|---------------|-----------------------|-------------|--------------------------------------------|----------------|-----------------------|--------------|------------------------------------------------|----------------------|---------------|
|                        | (N)           | (N.kg <sup>-1</sup> ) | (BW)        |                                            | (N)            | (N.kg <sup>-1</sup> ) | (BW)         |                                                |                      |               |
| 8                      | 1488.3 (53.6) | 19.7 (0.7)            | 2.01 (0.07) | 2960.5 (422.0)                             | 668.8 (53.6)   | 8.85 (0.7)            | 0.90 (0.07)  | 39.2 (5.6)                                     | 0.09 (0.006)         | 42.8          |
| 16                     | 1605.9 (29.7) | 21.25 (0.4)           | 2.17 (0.04) | 2911.4 (281.3)                             | 708.0 (29.7)   | 9.37 (0.4)            | 0.96 (0.04)  | 38.5 (3.7)                                     | 0.11 (0.008)         | 41.5          |
| 24                     | 1683.1 (33.4) | 22.27 (0.4)           | 2.27 (0.05) | 2696.6 (186.2)                             | 706.7 (33.4)   | 9.35 (0.4)            | 0.95 (0.05)  | 35.7 (2.5)                                     | 0.12 (0.006)         | 41.1          |
| 32                     | 1804.9 (61.5) | 23.89 (0.8)           | 2.44 (0.08) | 2344.2 (653.5)                             | 750.0 (61.5)   | 9.93 (0.8)            | 1.012 (0.08) | 31.0 (8.6)                                     | 0.15 (0.008)         | 42.9          |

312 Results reported as means (SD). BW = bodyweight. A/V = ratio of anterior (forward) horizontal to vertical GRF.  
 313

314 There was a very strong positive correlation between kettlebell weight and peak force, and  
315 kettlebell weight and forward force. For each 1 kg increase in kettlebell weight, peak net force  
316 increased by 12 to 16.5 N.kg<sup>-1</sup> and forward force by 2% to 3%. There was a strong negative  
317 correlation between kettlebell weight and RFD; for each 1 kg increase in kettlebell weight, RFD  
318 decreased by 11 to 39 N.s<sup>-1</sup>. Swing cadence remained relatively stable at 42.0 ± 0.6 SPM.

319

320 **Table 2:** Linear regression equations for peak net GRF, RFD, and forward force relative to vertical force, where  $x$  =  
321 kettlebell mass in kg.

|                                            |                                                               |
|--------------------------------------------|---------------------------------------------------------------|
| Peak net force (N)                         | $y = 1350 + 14.3x, r = 0.98 (p < 0.01), CI [12.0, 16.6]$      |
| Peak net force (N.kg <sup>-1</sup> )       | $y = 8.1 + 0.6x, r = 0.98 (p = 0.02), 95\% CI [0.03, 0.09]$   |
| RFD (N.s <sup>-1</sup> )                   | $y = 3112.7 - 25.3x, r = -0.81 (p = 0.03), CI [-39.2, -11.4]$ |
| RFD (N.s <sup>-1</sup> .kg <sup>-1</sup> ) | $y = 41.2 - 0.34x, r = -0.81 (p = 0.03), CI [-0.52, -0.15]$   |
| Forward force (A/V)                        | $y = 0.08 + 0.02x, r = 0.97 (p = 0.02), CI [0.02, 0.03]$      |

322

## 323 Discussion

324 Reliable kinetic reference data enables coaches and healthcare providers to make informed  
325 decisions about the potential benefits or risks of an exercise. These data can also provide valuable  
326 insights which influence how exercises are coached and tested. A properly designed program using  
327 resistance equipment, includes multi-joint exercises such as the kettlebell swing, is individualised,  
328 periodised, progressive, and includes appropriate technique instruction (Fragala et al., 2019). A  
329 recent review (Meigh et al., 2019) was unable to identify data from a proficient swing for any of  
330 these program variables. Results from the present case study provides some insight for coaches  
331 and healthcare providers to make more informed decisions about how to use the kettlebell swing  
332 for performance enhancement or prescription of therapeutic exercise, where such an exercise might  
333 be appropriate.

334

### 335 Peak Force

336 The magnitude of change in peak force with increasing kettlebell weight was surprisingly small.  
337 Quadrupling kettlebell weight from 8 kg to 32 kg, increased peak force by only 81.2 N. Net peak  
338 force increased by less than 30% (190 N) between the 8 kg and 56 kg swings. *“If your goal is  
339 more force production, swing a heavier kettlebell”* (Tsatsouline, 2013, p. 48) appears to be a  
340 somewhat misguided instruction. A strong correlation between GRF and kettlebell weight all the  
341 way up to 68 kg was also somewhat surprising. It was anticipated that the rate of increase would  
342 drop considerably with kettlebells heavier than 32 kg, but this was not the case.

343

344 Lake and Lauder (2012) reported peak force during swings with 16 kg, 24 kg and 32 kg as 18.8  
345 (0.5), 19.6 (1.4) and 21.5 (1.4) N.kg<sup>-1</sup>, respectively. Although absolute difference in mean values  
346 between the Instructor in the present study and those reported by Lake were small (range = 2.39  
347 to 2.67 N.kg<sup>-1</sup>), the ES were large to very large (16 kg:  $\delta = 4.9$ , 24 kg:  $\delta = 1.91$ , 32 kg:  $\delta = 1.71$ )

348 with 88.7% to 100% probability of superiority in favour of the Instructor. These data suggest that  
349 proficiency (technique) significantly alters ground reaction with large effect.

350  
351 With kettlebell weights from 10-20% BW, Levine and colleagues (Levine et al., 2020) reported  
352 peak GRF from 1.53 (0.2) to 1.67 (1.7) BW. The ES with comparable weights in the present study,  
353 was very large, ranging from  $\delta = 2.09$  (8 kg, 10% BW) to  $\delta = 2.72$  (12 kg, 15% BW), with a mean  
354 probability of superiority >95%. Bullock and colleagues (2017) reported peak vertical force of  
355 0.98 (0.1) BW, however data was not reported as net of system weight. In the present study, vertical  
356 GRF was 2.15 (0.1) BW with the same weight kettlebell (20 kg). The ES difference between  
357 studies is so unreasonably large, as to suggest that the data (or comparison) is unreliable. If the  
358 vertical force reported by Bullock and colleagues was net force, there would be a small effect size  
359 difference in favour of the novices (12 kg:  $\delta = 0.36$ , 20 kg:  $\delta = 0.57$ ). While not impossible, the  
360 data from Lake and Lauder (2012) suggests this scenario would be unlikely.

361  
362 Among male kettlebell sport competitors, Ross and colleagues (2017) reported peak GRF during  
363 a 24 kg kettlebell snatch as 2.10 (0.31) BW. In the present study, peak force during the 24 kg swing  
364 was 2.27 (0.05) BW. As force is a product of mass and acceleration, the small ES in favour of the  
365 swing ( $\delta = 0.55$ ) is most likely explained by the pronounced differences in cadence; 13.9 (3.3)  
366 snatches overhead per minute vs 42.3 SPM to chest height. These data appear otherwise  
367 comparable, suggesting that proficiency is more likely to influence mechanical demands and its  
368 associated effects, than the ‘style’ of kettlebell training (hardstyle vs Sport). This similarity in GRF  
369 also underscores the demands of a unilateral kettlebell exercise (swing, clean, snatch). This  
370 highlights an opportunity for coaches and healthcare providers to increase the physiological  
371 demand of the swing without increasing the weight.

372

### 373 **Rate of force development**

374 Rate of force development, claimed to be a defining feature of the hardstyle swing, is essential for  
375 sports performance. It is also an important consideration in rehabilitation and return to sport  
376 following injury, and critical for trip and falls prevention (Blazevich et al., 2020). In older adults,  
377 RFD may be more important than strength with respect to functional performance and maintaining  
378 independence (Kraschnewski et al., 2016; Palmer et al., 2016; Skelton et al., 2002). If the intent of  
379 a kettlebell swing is to improve RFD, the findings of this study suggest that even moderate-weight  
380 kettlebells (16-24 kg) may be counterproductive, with the lightest weight (8 kg) producing the  
381 highest RFD (38.2 N.s<sup>-1</sup>.kg<sup>-1</sup>). In the present study, swings performed with 40 kg (equal to 50%  
382 10RM), resulted in a 45% reduction in RFD compared to the 8 kg kettlebell.

383

384 “*When you cannot maintain your explosiveness any longer, it’s time to quit.*” (Tsatsouline, 2013,  
385 p. 20). The subject in the present study maintained desirable form up to 68 kg, yet the FTC and  
386 relative “explosiveness” had changed considerably. If explosiveness can be characterized by RFD  
387 and swing cycle phase duration, and maximising explosiveness is the training goal, we propose

388 that merging of the force peaks could be used to determine a maximum training weight. In this  
389 case, merging of the force peaks was evident with a 28 kg kettlebell. Kettlebell weights under 25%  
390 body mass, appear to be most suited for improving RFD in a two-handed hardstyle swing.

391

### 392 **Exercise prescription and coaching**

393 Tsatsouline (2006, p. 2) recommends that an average male beginner start with a 16 kg kettlebell,  
394 32 kg kettlebells being reserved for “advanced men”, stating that “*unless you are a powerlifter or*  
395 *a strongman, you have no business starting with a [24kg]*”. Tsatsouline suggests that an average  
396 woman should start with an 8 kg kettlebell and a strong woman 12 kg, with most women advancing  
397 to 16 kg. Often cited as recommended starting weights for the swing, these are general guidelines  
398 for kettlebell training, which includes other exercises such as the military press, goblet squat,  
399 snatch and Turkish get-up. A weight most suitable for a swing is unlikely to be the most appropriate  
400 for pressing overhead or deadlifting. If the kettlebell swing is to be performed explosively, with  
401 the aim to improve muscular power and functional performance, the results of the current study  
402 may suggest that slightly lighter loads than recommended by Tsatsouline (2006) might provide the  
403 best outcomes for most individuals. However, these recommendations might still need to be  
404 changed based on the size and strength of the participant, whereby such loads may be too light for  
405 a 110 kg strength athlete but too heavy for a 45 kg septuagenarian with osteoporosis. Choosing the  
406 most appropriate weight for a person performing a given kettlebell exercise, should be established  
407 at an individual level, with consideration given to factors such as training age, physical capacity  
408 and training goals.

409

410 “*The swing is an expression of forward force projection such as found in boxing or martial arts,*  
411 *like a straight punch.*” (Read, 2012). A hardstyle swing is defined by its dominant movement - hip  
412 extension. Instruction to drive the hips forward rapidly and aggressively, has translated to a belief  
413 that the dominant ground reaction is also in the forward horizontal direction. These data do not  
414 support that inference. Contrary to popular commentary, forward force ranged from 9% to 21%,  
415 with the median 13%. The difference in magnitude of forward force during swings with a 24 kg  
416 kettlebell reported by Lake and Lauder (2012) of 30% to the current study of 12%, cannot currently  
417 be explained, with the possible exception of the between study differences in starting position and  
418 kettlebell swing proficiency of the participants.

419

420 These data suggest that centrifugal force acting on the kettlebell is the result of a predominant  
421 ( $\approx 85-95\%$ ) vertical ground reaction. Training instruction encouraging a movement pattern  
422 consistent with a vertical jumping motion, rather than attempting to project the kettlebell forward,  
423 are likely to be more effective. Investigation of the influence of technique proficiency on the  
424 hammer throw (Murofushi et al., 2007), shows a shift in centre of mass significantly alters the  
425 pendular arc of motion, and resultant throwing distance. With similar observations in elite  
426 kettlebell sport athletes (Ross et al., 2015), it appears that small changes in technique, are most



427 likely to account for the large differences in GRF observed between expert and novice, highlighting  
428 the role and potential value of expert instruction and coaching.

429  
430 An ideal hardstyle swing can be identified by observing the person's body position at the beginning  
431 of the float (Fig. 2D), and end of the drop (Fig. 4F); they should look the same with the direction  
432 of bell travel not apparent from the body position. Use of slow-motion video analysis to provide  
433 feedback is encouraged as an effective teaching strategy (Beerse et al., 2020). Real-time  
434 biofeedback from a force platform could also be a useful tool for coaches and healthcare providers.  
435 Previous published FTCs of the hardstyle swing (Lake & Lauder, 2012; Mache & Hsieh, 2016)  
436 show a wide multi-peaked force profile, which is inconsistent with the single, narrow force peaks  
437 found in the present study. We propose that a multi-peaked FTC is representative of the active  
438 shoulder flexion described by Back and colleagues (2016). If phase durations are important and  
439 FTC characteristics a reliable indicator of proficiency, a FTC might be helpful in establishing the  
440 optimal swing weight.

441  
442 Proficient hardstyle practitioners perform the swing at a cadence of 40 SPM (Duncan et al., 2015;  
443 Thomas et al., 2014; Wesley & Kivi, 2017). The subject in the present study also self-reported a  
444 usual training cadence of 40 SPM. The slighter higher mean cadence of 42 SPM in the current  
445 study is attributed to the test conditions. While cadence may be intentionally increased or  
446 decreased, this is reported to feel "unnatural" (Wesley & Kivi, 2017), requires greater effort  
447 (Duncan et al., 2015), and is not recommended. *"Don't confuse a quick and explosive hip drive  
448 with manic speed. Pulling the kettlebell down and releasing your hips too soon without allowing  
449 the bell to float will give the sense that you are increasing speed, but it will not increase power  
450 production"* (Tsatsouline, 2013, p. 48).

451  
452 To optimise outcomes, prescription of a kettlebell swing should be personalised. Coaches and  
453 therapists will need to determine for the individual, if it is necessary or beneficial for kettlebell  
454 weight (intensity) to be increased, or whether the same training effect can be achieved with a higher  
455 number of repetitions using a lighter weight. Kettlebell swings allow a large volume of work to be  
456 performed in a short period of time. If the performance goal is simply to get 'Work' done, heavier  
457 kettlebells are an attractive option; what can be achieved in 90s with a 40 kg kettlebell using a 1:1  
458 work:rest ratio of 2x20 reps (1600 kg), would take 9m:30s at the same continuous pace with an 8  
459 kg kettlebell.

460  
461 The difference in training loading volume between 5 sets of 10 swings with an 8 kg, 16 kg, or 40  
462 kg kettlebell, is a substantial 1,600 kg. The difference in cardiovascular response and effort is also  
463 likely to be very high. Results from this study show a disproportionate increase in effort relative  
464 to kettlebell weight and the peak net force. Training parameters of exercise, weight, sets,  
465 repetitions and work:rest ratio are important variables for prescription, especially for individuals  
466 with higher-risk health conditions such as cardiovascular disease. Further research is warranted to

467 help coaches and healthcare providers determine safe and effective parameters for prescribing  
468 kettlebell exercises with at-risk populations.

469  
470 Increasing kettlebell weight or cadence increases cardiovascular response (Wesley & Kivi, 2017)  
471 however, a slower cadence can also increase effort (Duncan et al., 2015) as ‘swing’ and ‘drop’  
472 becomes a ‘lift’ and ‘lower’. A metronome can be used as an external cue to optimise efficiency  
473 in the hardstyle swing. Coaches and healthcare providers should also note that the cardiovascular  
474 demand of kettlebell swing is greater than walking (Thomas et al., 2014) and anticipate that heart  
475 rate (HR) will increase with continuous swings (Farrar et al., 2010) potentially to a relatively high  
476 percentage of HR<sub>max</sub>. Similar effects may also occur when performing multiple sets of swings with  
477 short periods of rest between sets (Wong et al., 2017). The magnitude of these cardiovascular  
478 responses may also need to be taken into account when prescribing kettlebell swing training to  
479 different individuals, especially clinical patients with compromised cardiovascular and/or  
480 respiratory function.

481  
482 **Strengths and limitations**  
483 The major strength of this study was the use of a RKC-certified kettlebell instructor as the expert  
484 and the large range of kettlebell swing loads and repetitions performed with each load. However,  
485 as this paper provides data from one certified kettlebell Instructor, the results cannot be generalised  
486 to all Instructors; replication is necessary to increase our confidence in the results. These data are  
487 from ground reaction only; concurrent motion capture would elucidate the kinetic and kinematic  
488 changes imposed by increasing kettlebell weight. Reliability in calculating RFD from a FTC may  
489 also be compromised where the onset of propulsion is not clear; meaning a more reliable  
490 standardised measure of calculating RFD is warranted. Ground reaction data from hardstyle swings  
491 cannot be generalised to the double knee-bend (kettlebell Sport) or overhead (American) swings  
492 which are kinematically different (Del Monte et al., 2020; Mitchell et al., 2015).

493  
494 **Conclusions**  
495 The aim of this paper was to profile the mechanical demands of a two-handed hardstyle kettlebell  
496 swing, performed by an RKC-certified Instructor. The force-time profile using light to moderate  
497 weights, was characterised by a smooth, single narrow force peak, immediately followed by a  
498 second peak of smaller magnitude. Small within- and between-set variability was observed, with  
499 cadence no less than 40 swings per minute. Flight time accounted for approximately one third of  
500 the swing cycle, for weights up to approximately 25% body mass. With increasing weight,  
501 propulsion and braking phases increased, evident by progressive merging of the force peaks.

502  
503 There was a very strong positive correlation between kettlebell weight and peak force, and  
504 kettlebell weight and forward force, although magnitude of change was small. For swings  
505 performed up to 56kg, peak net force increased by less than 30% than that produced with the 8 kg

506 load. More research is required to determine the potential benefits of performing swings with very  
507 heavy kettlebells.

508  
509 Median horizontal forward force was less than 15%, indicating that the hardstyle swing is an  
510 expression of a predominantly vertical ground reaction. Coaching movements consistent with a  
511 vertical jump are more likely to be effective than movements intended to project the kettlebell  
512 forward. There was a strong negative correlation with rate of force development. Kettlebells under  
513 25% body mass appear to be optimal for developing lower limb power, with the lightest weights  
514 resulting in the highest RFD.

515  
516 Results show that proficiency in hardstyle technique significantly changes ground reaction with  
517 large effect. Proficiency should be considered when reporting and interpreting data from novices.  
518 Developing a proficient hardstyle swing is likely to be beneficial, where mechanical demands are  
519 considered important. Further research is required to better understand the effects of kettlebell  
520 weight on outcomes of interests, and prescription variables within a hardstyle program.

521

## 522 **Acknowledgements**

523 The authors would like to acknowledge Mr Benjamin Hindle for his support in the calculation of  
524 rate of force development, and Mrs Evelyne Rathbone for her direction with statistical analysis

525

## 526 **Funding**

527 This study was supported by an Australian Government Research Training Program Scholarship  
528 and will contribute towards a Higher Degree by Research Degree (Doctor of Philosophy).

529

## 530 **Contributions**

531 NM conducted the study, curated and analysed the data, interpreted the results, conducted the  
532 formal analysis, and wrote the original draft. JK, BS and WH supported with ongoing consultation.  
533 JK and WH reviewed and provided revisions to earlier versions of the manuscript. All authors read  
534 and approved the final manuscript.

535

## 536 **Ethics declarations**

### 537 **Ethics approval and consent to participate**

538 Not applicable

539

### 540 **Consent for publication**

541 Not applicable

542

### 543 **Competing interests**

544 The primary author is a Physiotherapist and hardstyle kettlebell instructor, with an online  
545 presence as The Kettlebell Physio.

546  
547  
548

## 549 Rights and permissions

550 Open Access This article is distributed under the terms of the Creative Commons Attribution 4.0  
551 International License (<http://creativecommons.org/licenses/by/4.0/>), which permits unrestricted  
552 use, distribution, and reproduction in any medium, provided you give appropriate credit to the  
553 original author(s) and the source, provide a link to the Creative Commons license, and indicate if  
554 changes were made. The Creative Commons Public Domain Dedication waiver  
555 (<http://creativecommons.org/publicdomain/zero/1.0/>) applies to the data made available in this  
556 article, unless otherwise stated.

557

## 558 References

559

- 560 Back C-Y, Joo J-Y, and Kim Y-K. 2016. Kinematic comparisons of kettlebell two-arm swings by skill level. *Korean*  
561 *Journal of Sport Biomechanics* 26:39-50.
- 562 Beerse M, Bigelow KE, and Barrios JA. 2020. The patterning of local variability during the acquisition of a novel  
563 whole-body continuous motor skill in young adults. *Experimental Brain Research*.
- 564 Blazeovich AJ, Wilson CJ, Alcaraz PE, and Rubio-Arias JA. 2020. Effects of Resistance Training Movement Pattern  
565 and Velocity on Isometric Muscular Rate of Force Development: A Systematic Review with Meta-analysis  
566 and Meta-regression. *Sports medicine (Auckland)* 50:943-963. 10.1007/s40279-019-01239-x
- 567 Bullock GS, Schmitt AC, Shutt JM, Cook G, and Butler RJ. 2017. Kinematic and Kinetic Variables Differ Between  
568 Kettlebell Swing Styles. *International Journal of Sports Physical Therapy* 12:324-332.
- 569 Del Monte MJ, Opar DA, Timmins RG, Ross JA, Keogh JW, and Lorenzen C. 2020. Hamstring myoelectrical  
570 activity during three different kettlebell swing exercises. *The Journal of Strength & Conditioning Research*  
571 34:1953-1958.
- 572 Duncan M, Gibbard R, Raymond L, and Mundy P. 2015. The Effect of Kettlebell Swing Load and Cadence on  
573 Physiological, Perceptual and Mechanical Variables. *Sports* 3:202-208. 10.3390/sports3030202
- 574 Farrar RE, Mayhew JL, and Koch AJ. 2010. Oxygen cost of kettlebell swings. *Journal of Strength and Conditioning*  
575 *Research* 24:1034-1036. 10.1519/JSC.0b013e3181d15516
- 576 Foster C, Florhaug JA, Franklin J, Gottschall L, Hrovatin LA, Parker S, Doleshal P, and Dodge C. 2001. A new  
577 approach to monitoring exercise training. *The Journal of Strength & Conditioning Research* 15:109-115.
- 578 Fragala MS, Cadore EL, Dorgo S, Izquierdo M, Kraemer WJ, Peterson MD, and Ryan ED. 2019. Resistance  
579 Training for Older Adults. *Journal of Strength and Conditioning Research* 33:2019-2052.  
580 10.1519/jsc.0000000000003230
- 581 Hopkins WG, Marshall SW, Batterham AM, and Hanin J. 2009. Progressive statistics for studies in sports medicine  
582 and exercise science. *Med Sci Sports Exerc* 41:3-13. 10.1249/MSS.0b013e31818cb278
- 583 Jay K, Frisch D, Hansen K, Zebis MK, Andersen CH, Mortensen OS, and Andersen LL. 2011. Kettlebell training  
584 for musculoskeletal and cardiovascular health: a randomized controlled trial. *Scand J Work Environ Health*  
585 37:196-203. 10.5271/sjweh.3136
- 586 Kraschewski JL, Sciamanna CN, Poger JM, Rovniak LS, Lehman EB, Cooper AB, Ballentine NH, and Ciccolo JT.  
587 2016. Is strength training associated with mortality benefits? A 15year cohort study of US older adults.  
588 *Preventive Medicine* 87:121-127. 10.1016/j.ypmed.2016.02.038
- 589 Lake JP, Hetzler BS, and Lauder MA. 2014. Magnitude and relative distribution of kettlebell snatch force-time  
590 characteristics. *Journal of Strength and Conditioning Research* 28:3063-3072.  
591 10.1519/jsc.0000000000000538
- 592 Lake JP, and Lauder MA. 2012. Mechanical demands of kettlebell swing exercise. *Journal of Strength and*  
593 *Conditioning Research* 26:3209-3216. 10.1519/JSC.0b013e3182474280
- 594 Lenhard W, and Lenhard A. 2016. Calculation of Effect Sizes. Available at  
595 [http://www.psychometrica.de/effect\\_size.html2020](http://www.psychometrica.de/effect_size.html2020)).

- 596 Levine NA, Hasan MB, Avalos MA, Lee S, Rigby BR, and Kwon Y-H. 2020. Effects of kettlebell mass on lower-  
597 body joint kinetics during a kettlebell swing exercise. *Sports Biomechanics*:1-14.  
598 10.1080/14763141.2020.1726442
- 599 Mache MA, and Hsieh C. 2016. A Temporal and Kinetic Comparison of The Kettlebell Swing and Maximal  
600 Vertical Jump. ISBS-Conference Proceedings Archive.
- 601 Magnusson K. 2021. Interpreting Cohen's d effect size: An interactive visualization (Version 2.5.0) [Web App].  
602 Available at <https://rpsychologist.com/cohend/2021>.
- 603 McGill SM, and Marshall LW. 2012. Kettlebell swing, snatch, and bottoms-up carry: back and hip muscle  
604 activation, motion, and low back loads. *Journal of Strength and Conditioning Research* 26:16-27.  
605 10.1519/JSC.0b013e31823a4063
- 606 Meigh NJ, Keogh JW, Schram B, and Hing WA. 2019. Kettlebell training in clinical practice: a scoping review.  
607 *BMC Sports Science, Medicine and Rehabilitation* 11:19. 10.1186/s13102-019-0130-z
- 608 Mitchell J, Johnson W, Riemann B, Krajewski K, and Coates C. 2015. *Biomechanical Loading of the American*  
609 *Kettlebell Swing*.
- 610 Murofushi K, Sakurai S, Umegaki K, and Takamatsu J. 2007. Hammer acceleration due to thrower and hammer  
611 movement patterns. *Sports biomechanics / International Society of Biomechanics in Sports* 6:301-314.  
612 10.1080/14763140701489843
- 613 NSCA. 2017. NSCA Strength and Conditioning Professional Standards and Guidelines. *Strength & Conditioning*  
614 *Journal* 39:1-24. 10.1519/ssc.0000000000000348
- 615 Palmer RC, Batra A, Anderson C, Page T, Vieira E, and Seff L. 2016. Implementation of an Evidence-Based  
616 Exercise Program for Older Adults in South Florida. *Journal of Aging Research* 2016:9630241.  
617 10.1155/2016/9630241
- 618 Read A. 2012. The Kettlebell Swing: Why It's The Perfect Exercise. Available at  
619 <https://breakingmuscle.com/fitness/the-kettlebell-swing-why-its-the-perfect-exercise2020>.
- 620 Ross JA, Keogh JW, Wilson CJ, and Lorenzen C. 2017. External kinetics of the kettlebell snatch in amateur lifters.  
621 *PeerJ* 5:e3111. 10.7717/peerj.3111
- 622 Ross JA, Wilson CJ, Keogh JW, Ho KW, and Lorenzen C. 2015. Snatch Trajectory of Elite Level Girevoy  
623 (Kettlebell) Sport Athletes and its Implications to Strength and Conditioning Coaching. *International*  
624 *Journal of Sports Science & Coaching* 10:439-452. 10.1260/1747-9541.10.2-3.439
- 625 Schnettler C, Porcari J, Foster C, and Anders M. 2009. Physiologic responses to a kettlebell workout. *University of*  
626 *Wisconsin-La Crosse*.
- 627 Skelton DA, Kennedy J, and Rutherford OM. 2002. Explosive power and asymmetry in leg muscle function in  
628 frequent fallers and non-fallers aged over 65. *Age and Ageing* 31:119-125. 10.1093/ageing/31.2.119
- 629 Thomas JF, Larson KL, Hollander DB, and Kraemer RR. 2014. Comparison of two-hand kettlebell exercise and  
630 graded treadmill walking: effectiveness as a stimulus for cardiorespiratory fitness. *Journal of Strength and*  
631 *Conditioning Research* 28:998-1006. 10.1519/jsc.0000000000000345
- 632 Tsatsouline P. 2006. *Enter The Kettlebell!: Strength Secret of the Soviet Supermen*. St. Paul, MN, USA: Dragon  
633 Door Publications.
- 634 Tsatsouline P. 2013. *RKC Instructor Manual*. St. Paul, MN, USA: Dragon Door Publications Inc.
- 635 Tucker J. 2009. Principles of a Rehab Specialist: Kettlebells 101. Dynamic Chiropractic.
- 636 Wesley C. 2013. Effects of kettlebell mass & swing cadence on heart rate, blood lactate and ratings of perceived  
637 exertion during an interval kettlebell swing protocol. ProQuest Dissertations Publishing.
- 638 Wesley CVV, and Kivi D. 2017. The Effects of Kettlebell Mass and Swing Cadence on Heart Rate, Blood Lactate,  
639 and Rating of Perceived Exertion during an Interval Training Protocol. *International Journal of Sports*  
640 *Science* 7:122-127.
- 641 Wong A, Nordvall M, Walters-Edwards M, Lastova K, Francavillo G, Tripken J, and Figueroa A. 2017. Cardiac  
642 Autonomic and Blood Pressure Responses to an Acute Bout of Kettlebell Exercise. *Medicine and Science*  
643 *in Sports and Exercise* 49:721-721. 10.1249/01.mss.0000518918.69080.ab
- 644
